# Supplementary material
Source: publisher site journal article supplement (https://www.dovepress.com/article/321675)
Supplement: Supplementary file 1 [file get_supplementary_file.php]

**Maternal and paternal depression during pregnancy in China: prevalence, correlates, and network analysis**

Running head: Maternal and paternal depression

**Supplementary table 1 Scores of EPDS between women and partners (N=769).**

|  | **Women** | | | | | **Women’s Partners** | | | | |
| --- | --- | --- | --- | --- | --- | --- | --- | --- | --- | --- |
|  | **n** | **Min** | **Max** | **Mean** | **SD** | **n** | **Min** | **Max** | **Mean** | **SD** |
| **EPDS-Q1** | 769 | 0 | 3 | 0.24 | 0.516 | 769 | 0 | 3 | 0.16 | 0.443 |
| **EPDS-Q2** | 769 | 0 | 3 | 0.21 | 0.478 | 769 | 0 | 3 | 0.14 | 0.419 |
| **EPDS-Q3** | 769 | 0 | 3 | 0.92 | 0.784 | 769 | 0 | 3 | 0.57 | 0.723 |
| **EPDS-Q4** | 769 | 0 | 3 | 0.82 | 0.727 | 769 | 0 | 3 | 0.39 | 0.605 |
| **EPDS-Q5** | 769 | 0 | 3 | 0.51 | 0.705 | 769 | 0 | 3 | 0.22 | 0.480 |
| **EPDS-Q6** | 769 | 0 | 3 | 0.39 | 0.587 | 769 | 0 | 3 | 0.31 | 0.556 |
| **EPDS-Q7** | 769 | 0 | 3 | 0.86 | 0.792 | 769 | 0 | 3 | 0.50 | 0.687 |
| **EPDS-Q8** | 769 | 0 | 3 | 0.57 | 0.717 | 769 | 0 | 2 | 0.27 | 0.516 |
| **EPDS-Q9** | 769 | 0 | 3 | 0.92 | 0.829 | 769 | 0 | 2 | 0.19 | 0.460 |
| **EPDS-Q10** | 769 | 0 | 3 | 0.12 | 0.380 | 769 | 0 | 2 | 0.12 | 0.368 |
| **EPDS-Total** | 769 | 0 | 26 | 5.55 | 4.424 | 769 | 0 | 22 | 2.87 | 3.849 |
| Note: EPDS: Edinburgh Postnatal Depression Scale; Q: question; SD: standardized deviation; | | | | | | | | | | |

**Supplementary Figure 1 Comparison of bootstrapped confidence intervals (CIs) of edge weights between women and partners**


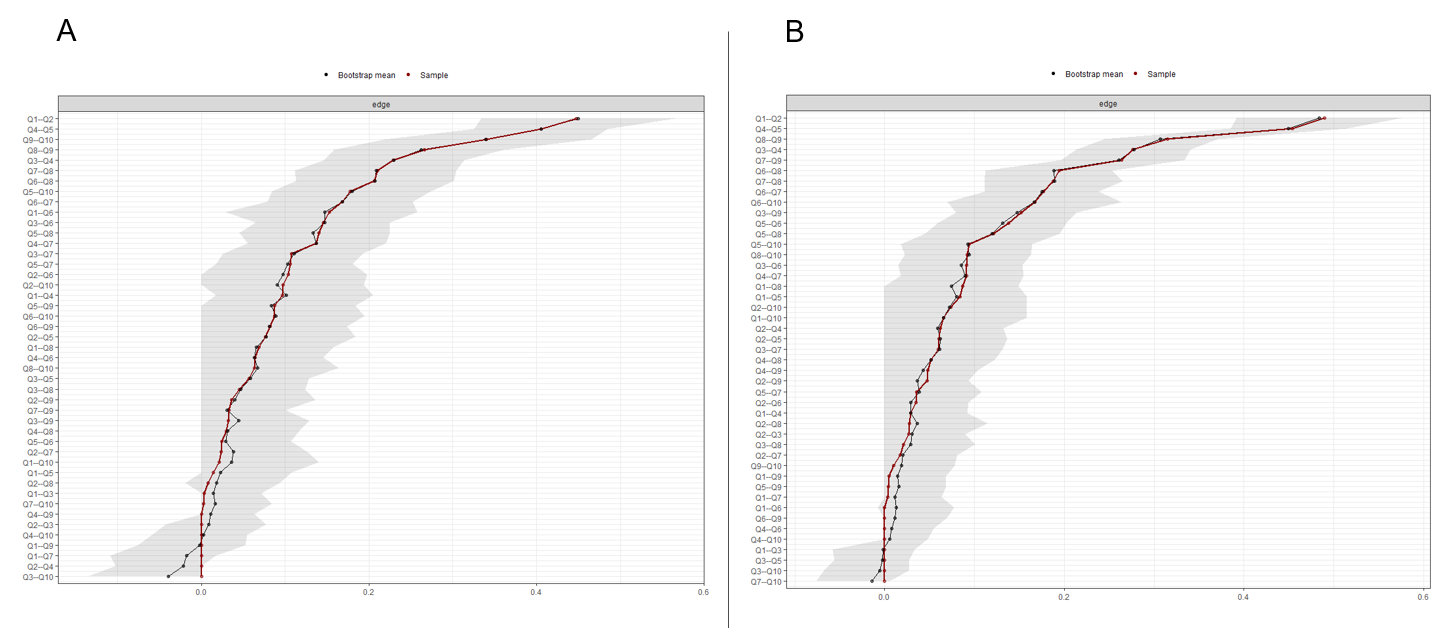


Note: A: Left panel, bootstrapped 95% CIs for estimated edge weights of the women; B: Right panel, bootstrapped 95% CIs for estimated edge weights of the partners. Q: question. The red dots indicate the values of each edge weight, ordered from the highest to the lowest value. The gray area represents the 95% Confidence Intervals of edge weights, estimated with the non-parametric bootstrap procedure. Wide intervals indicate lower stability and narrow intervals indicate higher stability.

**Supplementary Figure 2 Comparison of network properties between women and partners**


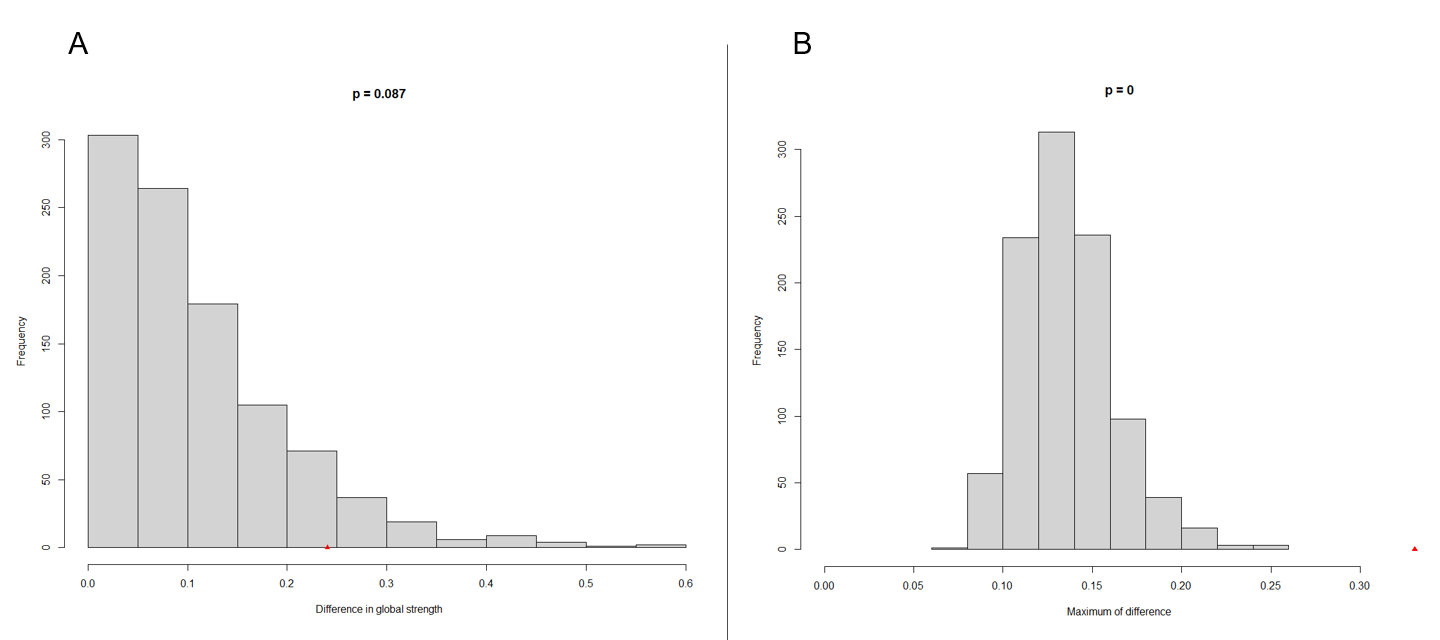


Note: A: Left panel, a plot of bootstrap value of the difference in network global strength; B: Right panel, a plot of bootstrap value of the maximum difference in any of the edge weights (1000 permutations).
